# Supplementary material for: Functionalized Mesoporous Silica Nanoparticles as Delivery Systems for Doxorubicin: Drug Loading and Release
Source: MDPI journal article supplement (doi:10.3390/app11136121), 2021-06-30
Supplement: s1 [file s1]

Archive with 1 entries (1 files):
- applsci-1256646-supplementary.pdf
