# Supplementary material for: Functionalized Mesoporous Silica Nanoparticles as Delivery Systems for Doxorubicin: Drug Loading and Release
Source: MDPI journal article supplement (doi:10.3390/app11136121), 2021-06-30
Supplement: s1 [file s1 › applsci-1256646-supplementary.pdf]

*Supplementary material*

## **Functionalized mesoporous silica nanoparticles as Delivery Systems for Doxorubicin: Drug loading and Release**

**Candace M. Day<sup>1</sup>, Martin J. Sweetman<sup>1,2</sup>, Yunmei Song<sup>1</sup>, Sally E. Plush<sup>1,2\*</sup>, Sanjay Garg<sup>1,2\*</sup>**

<sup>1</sup> University of South Australia: Clinical and Health Sciences, North Terrace, Adelaide SA 5000;

Candace.Day@mymail.unisa.edu.au, Martin.Sweetman@unisa.edu.edu.au,  
May.Song@unisa.edu.au, Sally.Plush@unisa.edu.au, Sanjay.Garg@unisa.edu.au.

<sup>2</sup> Future Industry Institute, University of South Australia, Mawson Lakes SA 5095.

\* Correspondence: Sally.Plush@unisa.edu.au; Tel.: +61-8-8302-2586;  
Sanjay.Garg@unisa.edu.au; Tel.: +61-8-8302-1575

### **Table of Contents**

#### *Figures*

|                 |   |
|-----------------|---|
| Figure S1:..... | 1 |
| Figure S2:..... | 2 |

#### *Additional experiments*

|                                                                              |   |
|------------------------------------------------------------------------------|---|
| E1. Synthesis of DOX@MSN-PLH-TAM by pre-surface grafting loading method..... | 1 |
| E2. Synthesis of DOX@MSN-PLH-TAM by pre-surface grafting loading method..... | 2 |

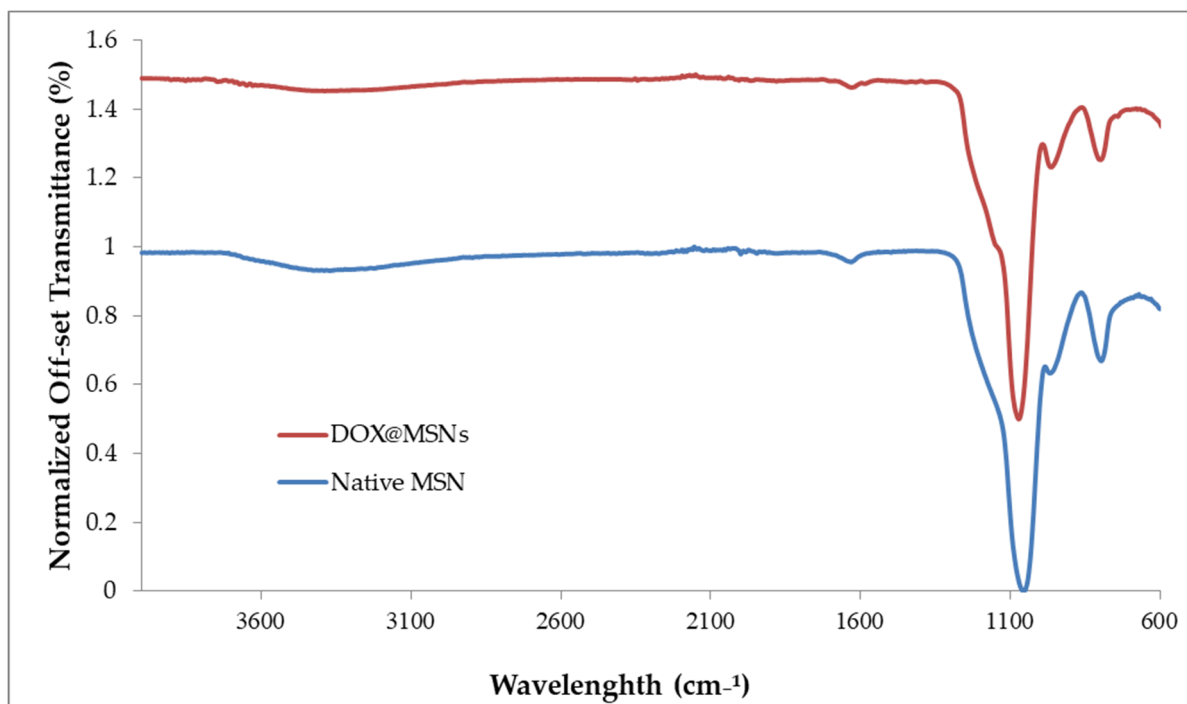

**Figure S1. FT-IR spectrum of DOX@MSNs vs unloaded native MSNs**

DOX-loaded sample demonstrated no additional peak compared to native MSNs, indicating a very low presence of loaded DOX.

### **E1. Synthesis of DOX@MSN-PLH using pre-surface grafting loading method**

To conduct this experiment, our previously published procedure was used to fabricate MSN-PLH was employed, with modification. DOX@MSNs (30 mg) were dispersed in anhydrous PhMe (5 ml) and ultrasonicated for 10 min. The solution was then heated to 110 °C, and MPTES (30 µL) was added. The solution was stirred vigorously under an N<sub>2</sub> atmosphere and protected from light overnight. The red solid DOX@MSN-SH was collected by centrifugation (12,000 RPM, 20 min, 24 °C); and washed extensively with anhydrous PhMe (5 ml × 3). Obtained DOX@MSN-SH particles were then dispersed in PBS buffer pH 5 and ultrasonicated for 10 min. To this aqueous solution was added Mal-PLH-NH<sub>2</sub> (20 mg), and the reaction was stirred under an N<sub>2</sub> atmosphere for 24 h at room temperature. The desired red solid DOX@MSN-PLH was then collected by centrifugation (12,000 RPM, 20 min, 24 °C) and left to dry under vacuum in a desiccator until fully dried. The FT-IR spectrum of resulting DOX@MSN-PLH compared to unloaded MSN-PLH was demonstrated in Fig S2.

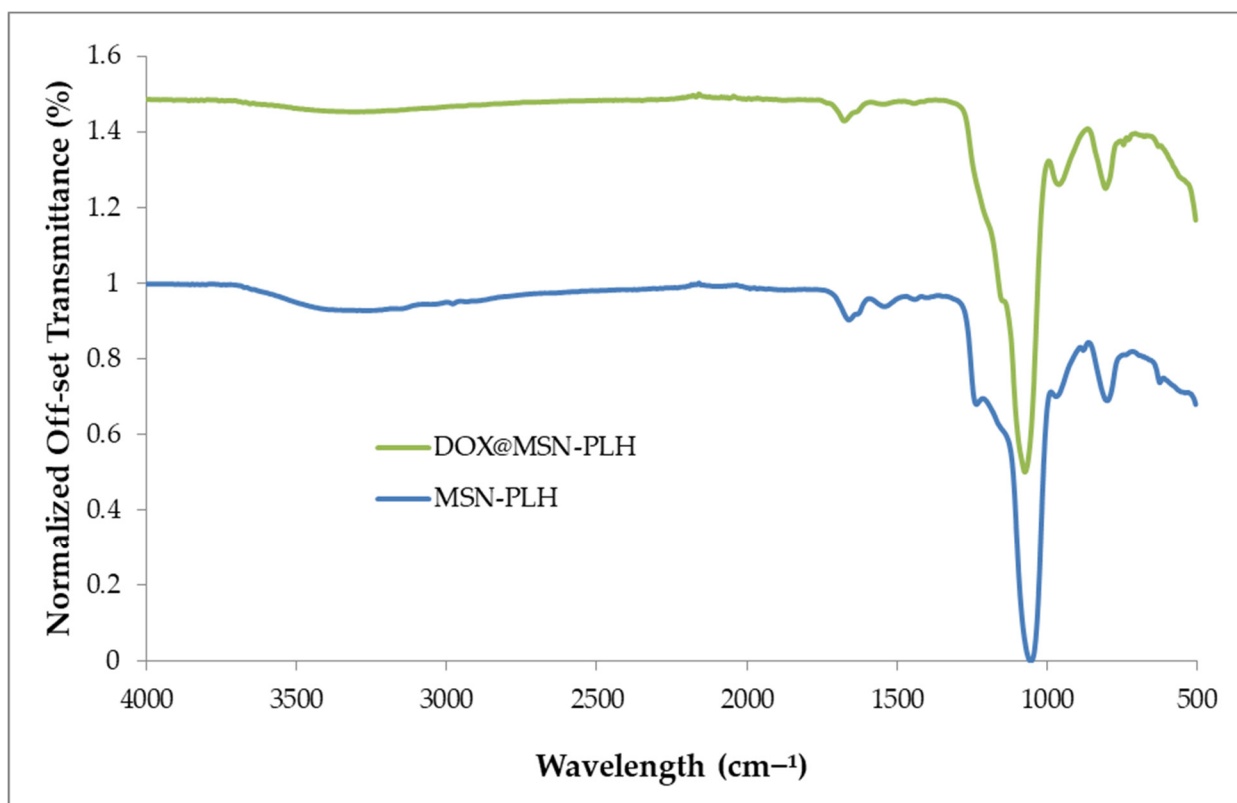

**Figure S2. FT-IR spectrum of DOX@MSN-PLH vs unloaded MSN-PLH**

DOX-loaded sample demonstrated no additional peak compared to native MSNs, indicating a very low presence of loaded DOX.

## **E2. Synthesis of DOX@MSN-PLH-TAM using pre-surface grafting loading method**

DOX@MSN-PLH (33 mg) was ultrasonically dispersed in anhydrous CH<sub>3</sub>CN (3.5 mL) before a solution of TAM-TEG-OMs (33 mg, 0.054 mmol, prepared in-house) [1] in CH<sub>3</sub>CN (1 mL) was added. The suspension was stirred at 80 °C for 24 h. The resulting red precipitate DOX@MSN-PLH-TAM was collected using centrifugation (12,000 RPM, 15 min) and washed extensively with CH<sub>3</sub>CN (5 mL × 3). The solid was collected and left to dry under vacuum in a desiccator until fully dried.

<sup>[1]</sup> Day, C.M.; Sweetman, M.J.; Hickey, S.M.; Song, Y.; Liu, Y.; Zhang, N.; Plush, S.E.; Garg, S. Concept Design, Development and Preliminary Physical and Chemical Characterization of Tamoxifen-Guided-Mesoporous Silica Nanoparticles. *Molecules* **2021**, *26*, 219.
